# Supplementary material
Source: HighWire-hosted journal article supplement (https://www.life-science-alliance.org/content/6/11/e202302131/F8)

Figure 4C

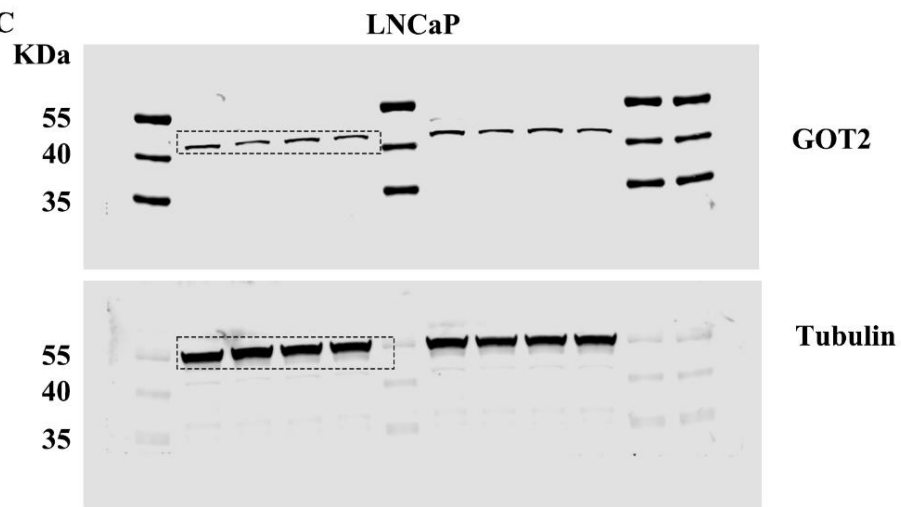

Figure 4D

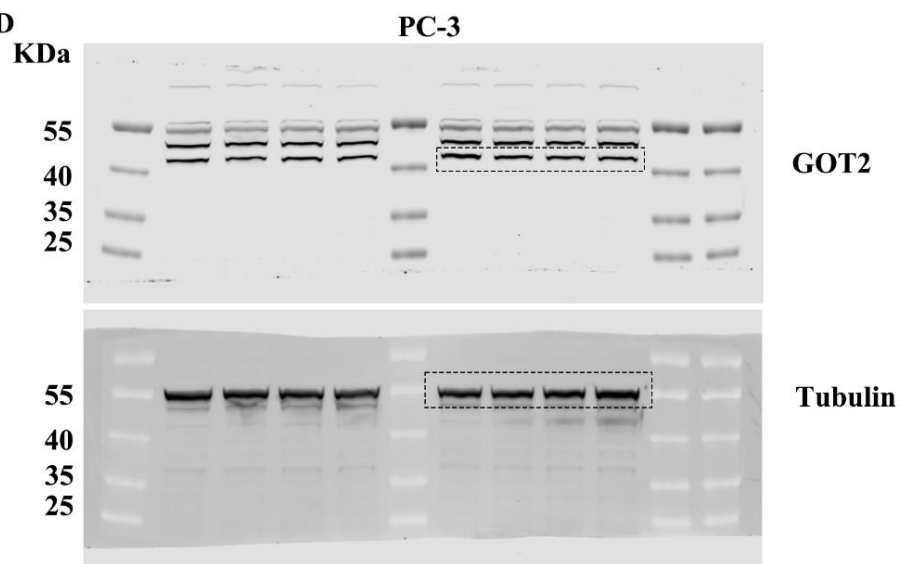

Supplement: inline-supplementary-material-4 [file inline-supplementary-material-4.pdf]
